# Supplementary material for: Insights into the caleosin family in Cyperus esculentus, an oil-rich tuber plant in Cyperaceae
Source: Research Square preprint supplement (doi:10.21203/rs.3.rs-8567486/v1), 2026-02-16
Supplement: Supplementary file 1 [file Additional file 1.xlsx]

## Sheet: Sheet1
Additional file 1 Percent similarity within and between CeCLOs, OsCLOs, and AtCLOs.
Percent similarity (%)	CeCLO1	CeCLO2	CeCLO3	CeCLO4	CeCLO5	CeCLO6	CeCLO7	CeCLO8	OsCLO1	OsCLO2	OsCLO3	OsCLO4	OsCLO5	OsCLO6	OsCLO7	OsCLO8	AtCLO1	AtCLO2	AtCLO3	AtCLO4	AtCLO5	AtCLO6	AtCLO7	AtCLO8
CeCLO1	100
CeCLO2	78.57	100
CeCLO3	71.37	73.77	100
CeCLO4	58.08	64.17	60.56	100
CeCLO5	57.25	60.92	53.09	74.81	100
CeCLO6	52.19	53.88	50	50.4	48.69	100
CeCLO7	45.85	47.95	45.93	48.16	44.32	72.77	100
CeCLO8	44.49	50.81	51.25	47.04	49.06	66.04	60.95	100
OsCLO1	47.64	45.74	46	47.66	46.44	56.89	53.25	50	100
OsCLO2	44.4	48.63	50.2	53.69	46.98	60.53	58.93	49.79	72.65	100
OsCLO3	56.73	57.25	55.76	60.56	59.45	45.71	44.04	41.55	47.33	52.82	100
OsCLO4	74.48	69.23	62.85	55.25	53.59	47.02	41.26	44.48	41.22	41.86	54.1	100
OsCLO5	75.4	75.41	74.8	62.75	60.22	49.6	46.94	48.16	45.74	48.02	59.78	67.48	100
OsCLO6	43.12	40.45	41.44	43.54	44.36	55.32	53.71	51.08	57.33	57.76	43.36	39.74	44.31	100
OsCLO7	44.49	42.38	41.83	46.21	46.18	54.47	53.71	45.97	56.77	58.19	41.69	41.39	45.49	95.56	100
OsCLO8	49.81	54.18	47.74	53.73	51.66	64.05	55.97	53.04	53.18	52.79	49.82	46.28	53.78	56.03	53.41	100
AtCLO1	70.61	73.52	68.38	59.16	54.38	50.81	43.78	46.67	48.78	47.67	54.84	65.41	69.57	40	41.24	41.18	100
AtCLO2	72.16	76.64	70.28	59.38	55.68	49.19	42.13	45.85	47.01	50.2	55.36	64.6	69.51	39.21	39.49	41.05	87.76	100
AtCLO3	70.24	73.14	71.55	66.12	62.07	53.72	50	49.79	48.97	47.37	58.55	64.21	75.41	41.2	42.59	56.33	72.47	72.65	100
AtCLO4	46.67	49.38	49.79	51.42	47.37	68.97	63.78	59.15	53.48	54.98	42.36	44.64	48.57	50.21	49.37	61.94	47.35	42.8	50.62	100
AtCLO5	42.5	45.7	48.06	54.58	47.25	62.56	52.47	54.31	50.42	54.66	41.83	39.68	46.67	50.41	50	56.63	48.25	49.4	50	68.49	100
AtCLO6	45.24	48.56	47.28	48.79	45.66	67	63.08	57.62	56.31	54.19	45.13	41.96	46.53	50	50	55.37	44.49	46.09	47.5	85.71	66.67	100
AtCLO7	37.36	40.38	41.04	42.8	43.18	54.63	45.09	45.26	43.78	46.67	39.86	33.56	41.09	42.17	40.94	40.43	42.97	39.06	43.82	61.5	62.66	52.17	100
AtCLO8	51.79	54.73	54.96	50.81	47.51	36.82	34.02	33.6	34.8	35.97	45.76	48.43	57.38	33.07	30.19	34.69	53.97	53.6	59.17	36.1	32.71	37.13	29.15	100
