# Supplementary material for: Insights into the caleosin family in Cyperus esculentus, an oil-rich tuber plant in Cyperaceae
Source: Research Square preprint supplement (doi:10.21203/rs.3.rs-8567486/v1), 2026-02-16
Supplement: Supplementary file 2 [file Additional file 4.xlsx]

## Sheet: Sheet1
Additional file 4 caleosin family genes identified in representative plant species.
Gene name	Other name	Locus	Position	Duplicate	Mode	Caleosin location	Clade
AtrCLO1	-	AmTrH2.01G071900	Chr1:22401966..22407623(-)	-	-	58..226	H
AtrCLO2	-	AmTrH2.04G140100	Chr4:52951418..52955081(+)	AtrCLO1	Transposed	27..194	L
VvCLO1	-	Vitvi05g00819	Chr5:9416882..9418420(+)	-	-	60..227	H
VvCLO2	-	Vitvi01g00478	Chr1:5290043..5297641(-)	VvCLO1	Dispersed	24..190	L
RcCLO1	RcCLO-2	LOC8265744	Chr9:4785591..4787747(+)	-	-	60..226	H
RcCLO2	RcCLO-1	LOC8277337	Chr5:10894076..10897475(-)	RcCLO1	Dispersed	20..187	L
AtCLO1	ATPXG1, ATS1	AT4G26740	Chr4:13473516..13475371(-)	-	-	64..230	H
AtCLO2	ATPXG2, ATS2	AT5G55240	Chr5:22405896..22407351(+)	AtCLO1	Alpha WGD	63..229	H
AtCLO3	ATPXG3, CLO-3, RD20	AT2G33380	Chr2:14144831..14146555(-)	AtCLO1	Dispersed	58..226	H
AtCLO4	ATPXG4	AT1G70670	Chr1:26644565..26646200(+)	AtCLO1	Dispersed	16..182	L
AtCLO5	ATPXG5	AT1G23240	Chr1:8253454..8253548(-)	AtCLO6	Alpha WGD	35..202	L
AtCLO6	-	AT1G70680	Chr1:26647205..26648737(+)	AtCLO4	Tandem	16..183	L
AtCLO7	-	AT1G23250	Chr1:8255127..8256770(-)	AtCLO5	Tandem	50..188	L
AtCLO8	-	AT5G29560	Chr5:11190414..11191967(-)	AtCLO3	Transposed	61..171	H
AaCLO1	-	Acora.01G211300	Chr1:35275465..35277109(-)	-	-	58..225	H
AaCLO2	-	Acora.02G135500	Chr2:28333997..28336620(-)	AaCLO1	Dispersed	61..228	H
AaCLO3	-	Acora.02G135600	Chr2:28345197..28347021(-)	AaCLO2	Tandem	61..228	H
AaCLO4	-	Acora.07G206900	Chr7:26781845..26787079(-)	AaCLO1	Dispersed	18..186	L
ZmaCLO1	-	Zosma01g38370	Chr1:4418958..4419332(+)	-	-	59..226	H
ZmaCLO2		Zosma03g30930	Chr3:4418958..4419332(+)	ZmaCLO1	Dispersed	14..183	L
SpCLO1	-	Spipo16G0047000	Chr16:3134808..3136481(-)	-	-	58..225	H
SpCLO2		Spipo15G0035100	Chr15:3407912..3411404(-)	SpCLO3	Tandem	12..179	L
SpCLO3		Spipo15G0035000	Chr15:3404274..3405887(-)	SpCLO2	Tandem	12..179	L
SpCLO4		Spipo15G0034900	Chr15:3393968..3395574(-)	SpCLO1	Dispersed	36..203	L
AoCLO1	-	evm.TU.AsparagusV1_10.1899	Chr10:72241098..72242126(-)	-	-	134..302	H
AoCLO2	-	evm.TU.AsparagusV1_04.179	Chr4:4532154..4534617(-)	AoCLO1	WGD	59..225	H
AoCLO3	-	evm.TU.AsparagusV1_04.180	Chr4:4548967..4553889(-)	AoCLO2	Tandem	58..225	H
AoCLO4	-	evm.TU.AsparagusV1_03.1560	Chr3:35761722..35801552(+)	AoCLO1	Dispersed	27..194	H
AoCLO5	-	evm.TU.AsparagusV1_06.542	Chr6:10631892..10638699(+)	AoCLO1	Dispersed	39..215	L
DcCLO1		Dca002967	Scf231:10069953..10072123(+)	-	-	58..224	H
DcCLO2		Dca022289	Scf183:76554..87496(-)	DcCLO1	Dispersed	57..224	H
DcCLO3		Dca025874	Scf576:192463..204476(+)	DcCLO1	Dispersed	17..184	L
DaCLO1	-	Dioal.02G088700	Chr2:21639198..21640955(-)	-	-	58..225	H
DaCLO2	-	Dioal.05G185500	Chr5:22764893..22767903(+)	DaCLO1	Dispersed	61..228	H
DaCLO3	-	Dioal.05G185600	Chr5:22770492..22773402(+)	DaCLO2	Tandem	55..222	H
DaCLO4	-	Dioal.20G002400	Chr20:646985..649433(-)	DaCLO2	Dispersed	55..223	H
DaCLO5	-	Dioal.18G050400	Chr18:21911666..21914826(+)	DaCLO1	Dispersed	9..177	L
EgCLO1	-	Egu009784	Chr4:6638052..6641713(+)	-	-	58..225	H
EgCLO2	-	Egu014751	Chr10:6639215..6644618(-)	EgCLO1	Dispersed	57..223	L
EgCLO3	-	Egu007417	Chr3:52076991..52090815(+)	EgCLO2	WGD	38..204	L
EgCLO4	-	Egu007416	Chr3:51974610..51977857(+)	EgCLO3	Tandem	31..198	L
EgCLO5	-	Egu007415	Chr3:51865242..51872134(-)	EgCLO4	Tandem	29..196	L
EgCLO6	-	Egu007414	Chr3:51751487..51762151(-)	EgCLO5	Tandem	25..192	L
AcCLO1	-	Aco019722	Chr3:5593248..5605814(+)	-	-	67..233	H
AcCLO2	-	Aco028942	Chr3:7201066..7205183(+)	AcCLO1	Dispersed	61..228	H
AcCLO3	-	Aco013430	Chr15:10076464..10083901(+)	AcCLO1	Dispersed	59..226	H
AcCLO4	-	Aco013431	Chr15:10063479..10070492(+)	AcCLO3	Tandem	59..226	H
AcCLO5	-	Aco002974	Chr6:12941166..12944918(-)	AcCLO1	Dispersed	13..180	L
SsCLO1	-	evm.TU.Chr8.813	Chr8:5570797..5571794(+)	-	-	58..226	H
SsCLO2	-	evm.TU.Chr2.1045	Chr2:7959689..7961288(+)	SsCLO1	WGD	58..225	H
SsCLO3	-	evm.TU.Chr2.1040	Chr2:7928520..7930578(+)	SsCLO2	Tandem	58..225	H
SsCLO4	-	evm.TU.Chr9.1308	Chr9:24846498..24848159(-)	SsCLO1	Dispersed	16..183	L
SsCLO5	-	evm.TU.Chr9.1309	Chr9:24849770..24850757(-)	SsCLO4	Tandem	13..180	L
SsCLO6	-	evm.TU.Chr1.3304	Chr1:42172285..42173276(+)	SsCLO4	WGD	10..176	L
JaCLO1	-	Joasc.05G050200	Chr5:47013081..47016014(-)	-	-	93..260	H
JaCLO2	-	Joasc.05G050500	Chr5:47322839..47334558(+)	JaCLO1	Proximal	59..227	H
JaCLO3	-	Joasc.02G152300	Chr2:63396786..63405507(+)	JaCLO1	Dispersed	60..227	H
JaCLO4	-	Joasc.11G116700	Chr11:58026560..58028037(-)	JaCLO1	Dispersed	14..183	L
JaCLO5	-	Joasc.11G116900	Chr11:58033414..58035664(-)	JaCLO4	Proximal	20..187	L
JaCLO6	-	Joasc.11G117000	Chr11:58036507..58038592(-)	JaCLO5	Tandem	30..197	L
PhCLO1	-	Phala.06G160100	Chr6:80953258..80954692(-)	-	-	98..265	H
PhCLO2	-	Phala.06G160200	Chr6:80955729..80959192(-)	PhCLO1	Tandem	68..236	H
PhCLO3	-	Phala.01G308700	Chr1:103961738..103965477(-)	PhCLO1	Dispersed	60..227	H
PhCLO4	-	Phala.02G276600	Chr2:98379194..98381049(+)	PhCLO1	Dispersed	37..204	L
PhCLO5	-	Phala.04G085100	Chr4:11069383..11073383(-)	PhCLO4	WGD	23..192	L
OsCLO1		LOC_Os02g50140	Chr2:30631239..30632768(+)	OsCLO6	WGD	38..204	L
OsCLO2		LOC_Os02g50174	Chr2:30642392..30654611(+)	OsCLO1	Proximal	45..212	L
OsCLO3		LOC_Os03g12230	Chr3:6417903..6420701(+)	OsCLO4	Dispersed	67..233	H
OsCLO4		LOC_Os04g43170	Chr4:25554735..25556460(-)	-	-	107..274	H
OsCLO5	EFA27	LOC_Os04g43200	Chr4:25563393..25565204(-)	OsCLO4	Proximal	65..233	H
OsCLO6	-	LOC_Os06g14324	Chr6:7983955..7990958(-)	OsCLO4	Dispersed	37..204	L
OsCLO7	-	LOC_Os06g14350	Chr6:7996891..8004842(-)	OsCLO6	Proximal	37..204	L
OsCLO8	-	LOC_Os06g14370	Chr6:8011835..8014837(-)	OsCLO7	Tandem	37..205	L
HvCLO1		HORVU.MOREX.r3.2HG0181040	Chr2H:555990821..555993432(-)	-	-	123..290	H
HvCLO2		HORVU.MOREX.r3.2HG0181160	Chr2H:556416749..556418991(-)	HvCLO1	Proximal	64..231	H
HvCLO3		HORVU.MOREX.r3.2HG0181170	Chr2H:556601292..556602888(-)	HvCLO2	Tandem	64..231	H
HvCLO4		HORVU.MOREX.r3.2HG0181240	Chr2H:557130973..557133026(-)	HvCLO3	Tandem	67..234	H
HvCLO5		HORVU.MOREX.r3.4HG0395710	Chr4H:527979229..527982053(-)	HvCLO1	Dispersed	104..271	H
HvCLO6		HORVU.MOREX.r3.6HG0613020	Chr6H:493990115..493992321(+)	HvCLO1	Proximal	45..210	L
HvCLO7		HORVU.MOREX.r3.6HG0612980	Chr6H:493740358..493742014(+)	HvCLO6	Proximal	44..210	L
HvCLO8		HORVU.MOREX.r3.3HG0286900	Chr3H:474252534..474255287(-)	HvCLO7	Dispersed	39..205	L
HvCLO9		HORVU.MOREX.r3.7HG0669580	Chr7H:109714224..109718283(-)	HvCLO7	WGD	31..200	L
HvCLO10		HORVU.MOREX.r3.7HG0669590	Chr7H:109744039..109746414(-)	HvCLO9	Tandem	31..200	L
BdOLE1		Bradi5g15410	Bd5:18934459..18936108(-)	-	-	121..288	H
BdOLE2		Bradi5g15418	Bd5:18939836..18941434(-)	BdOLE1	Tandem	62..229	H
BdOLE3		Bradi5g15427	Bd5:18943224..18944617(-)	BdOLE2	Tandem	68..235	H
BdOLE4		Bradi1g69571	Bd1:68303053..68305844(-)	BdOLE1	Dispersed	120..286	H
BdOLE5		Bradi3g56811	Bd3:56329285..56331914(-)	BdOLE1	Dispersed	43..208	L
BdOLE6		Bradi3g56821	Bd3:56332248..56333958(-)	BdOLE5	Tandem	42..209	L
BdOLE7		Bradi1g70390	Bd1:68963053..68965972(+)	BdOLE5	Dispersed	40..207	L
BdOLE8		Bradi1g44207	Bd1:42471581..42474977(+)	BdOLE5	WGD	43..210	L
BdOLE9		Bradi1g44200	Bd1:42463644..42467423(+)	BdOLE8	Tandem	23..192	L
SbCLO1		Sobic.006G143600	Chr6:51985966..51987992(-)	-	-	129..296	H
SbCLO2		Sobic.001G452100	Chr1:77035383..77038397(-)	SbCLO1	Dispersed	65..231	H
SbCLO3		Sobic.001G452200	Chr1:77046373..77049913(-)	SbCLO2	Tandem	59..225	H
SbCLO4		Sobic.004G247400	Chr4:62022863..62025357(-)	SbCLO1	Dispersed	40..206	L
SbCLO5		Sobic.004G247500	Chr4:62028084..62029807(-)	SbCLO4	Tandem	56..222	L
SbCLO6		Sobic.010G104600	Chr10:9965492..9967414(-)	SbCLO4	WGD	48..215	L
SbCLO7		Sobic.010G104700	Chr10:9968286..9972034(-)	SbCLO6	Tandem	41..208	L
SbCLO8		Sobic.010G104800	Chr10:9976135..9980682(-)	SbCLO7	Tandem	35..202	L
SbCLO9		Sobic.010G104900	Chr10:9983768..9988250(-)	SbCLO8	Tandem	32..200	L
SbCLO10		Sobic.010G105000	Chr10:9993934..9997542(-)	SbCLO9	Tandem	31..199	L
SiCLO1		Seita.7G162900	Chr7:25784337..25786182(-)	-	-	126..293	H
SiCLO2		Seita.9G486300	Chr9:54429789..54435668(-)	SiCLO1	Dispersed	66..232	H
SiCLO3		Seita.1G311000	Chr1:39863776..39866410(+)	SiCLO1	Dispersed	36..202	H
SiCLO4		Seita.1G310900	Chr1:39849535..39854195(+)	-	-	44..212	L
SiCLO5		Seita.4G111700	Chr4:10468702..10472573(-)	SiCLO4	WGD	61..228	L
SiCLO6		Seita.4G112200	Chr4:10548635..10552831(-)	SiCLO5	Proximal	24..192	L
SiCLO7		Seita.4G112100	Chr4:10543544..10547044(-)	SiCLO6	Tandem	91..259	L
SiCLO8		Seita.4G112000	Chr4:10535409..10537704(-)	SiCLO7	Tandem	31..199	L
JeCLO1	-	6G00346370	Chr6:10911599..10912810(+)	-	-	63..230	H
JeCLO2	-	8G00374940	Chr8:1635860..1637061(+)	JeCLO1	WGD	65..232	H
JeCLO3	-	8G00374930	Chr8:1634175..1635443(+)	JeCLO2	Tandem	58..226	H
JeCLO4	-	1G00004790	Chr1:2353381..2357044(+)	JeCLO1	Dispersed	17..185	L
JeCLO5	-	1G00004830	Chr1:2393789..2397800(+)	JeCLO4	Tandem	15..183	L
JiCLO1		Jinf03g07730	Scf3:7160430 7161635(+)	-	-	63..230	H
JiCLO2		Jinf06g03100	Scf6:2020962 2022167(+)	JiCLO1	WGD	65..226	H
JiCLO3		Jinf06g03090	Scf6:2019046 2020735(+)	JiCLO2	Tandem	58..226	H
JiCLO4		Jinf01g03510	Scf1:2997673 3001333(+)	JiCLO1	Dispersed	17..185	L
RbCLO1		3_h1G00549080	Chr3:35342655..35344286(-)	-	-	73..239	H
RbCLO2		1_h1G00064380	Chr1:38794900..38796690(+)	RbCLO1	WGD	66..234	H
RbCLO3		1_h1G00064350	Chr1:38786413..38789395(+)	RbCLO2	Proximal	58..225	H
RbCLO4		5_h1G00964910	Chr5:40134899..40137744(-)	RbCLO1	Dispersed	57..225	H
RbCLO5		2_h1G00350670	Chr2:47241479..47244948(+)	RbCLO1	Dispersed	20..187	L
RbCLO6		2_h1G00350630	Chr2:47221147..47228126(+)	RbCLO5	Proximal	40..209	L
RbCLO7		2_h1G00350620	Chr2:47215978..47219922(+)	RbCLO6	Tandem	41..209	L
RbCLO8		2_h1G00350610	Chr2:47206774..47213770(+)	RbCLO7	Tandem	43..211	L
ClCLO1	-	FCM35_KLT06708	Chr16:5806034..5807474(+)	-	-	65..232	H
ClCLO2	-	FCM35_KLT13359	Chr25:2455506..2457180(+)	ClCLO1	WGD	65..232	H
ClCLO3	-	FCM35_KLT13357	Chr25:2446317..2448631(+)	ClCLO2	Proximal	59..225	H
ClCLO4	-	FCM35_KLT02955	Chr12:4366722..4368707(+)	ClCLO1	Dispersed	19..186	L
ClCLO5	-	FCM35_KLT02954	Chr12:4322827..4325240(+)	ClCLO4	Tandem	18..182	L
ClCLO6	-	FCM35_KLT02953	Chr12:4310009..4311817(+)	ClCLO5	Tandem	43..211	L
ClCLO7	-	FCM35_KLT02951	Chr12:4298877..4304381(+)	ClCLO6	Proximal	45..211	L
BpCLO1	-	Bpl19G004350	Chr19:4077187..4078704(-)	-	-	75..241	H
BpCLO2	-	Bpl15G003160	Chr15:3103699..3105155(-)	BpCLO1	WGD	59..227	H
BpCLO3	-	Bpl15G003170	Chr15:3110288..3112005(-)	BpCLO2	Tandem	68..234	H
BpCLO4	-	Bpl11G002400	Chr11:2750295..2752468(+)	BpCLO2	Dispersed	61..226	H
BpCLO5	-	Bpl11G002390	Chr11:2743641..2745596(+)	BpCLO4	Tandem	57..225	H
BpCLO6	-	Bpl51G002600	Chr51:2520460..2522750(-)	BpCLO1	Dispersed	20..187	L
BpCLO7	-	Bpl51G002610	Chr51:2530046..2532013(-)	BpCLO6	Tandem	43..211	L
BpCLO8	-	Bpl51G002620	Chr51:2533343..2535458(-)	BpCLO7	Tandem	41..209	L
StCLO1	-	-	Chr9:2277225..2279053(+)	-	-	73..240	H
StCLO2	-	-	Chr21:2279053..17621028(-)	StCLO1	WGD	65..231	H
StCLO3	-	-	Chr21:17609152..17610696(-)	StCLO2	Tandem	68..234	H
StCLO4	-	-	Chr5:6952110..6953911(+)	StCLO2	Dispersed	57..225	H
StCLO5	-	-	Chr16:24737045..24739051(+)	StCLO2	Dispersed	20..187	H
StCLO6	-	-	Chr15:24073351..24075834(+)	StCLO5	Dispersed	20..187	L
StCLO7	-	-	Chr15:24055029..24056881(+)	StCLO6	Tandem	42..209	L
CfCLO1	-	-	Chr4:903766..905268(+)	-	-	74..240	H
CfCLO2	-	-	Chr6:10218556..10220050(+)	CfCLO1	WGD	63..230	H
CfCLO3	-	-	Chr6:10214824..10217222(+)	CfCLO2	Tandem	59..225	H
CfCLO4	-	-	Chr2:13544650..13546971(+)	CfCLO2	Dispersed	62..230	H
CfCLO5	-	-	Chr8:11017403..11019219(+)	CfCLO4	Dispersed	24..191	H
CfCLO6	-	-	Chr8:11008562..11010585(+)	CfCLO5	Tandem	37..205	L
CfCLO7	-	-	Chr8:11001835..11004768(+)	CfCLO6	Tandem	43..210	L
CrCLO1	-	Crochr55G000205	Chr55:1975405..1976849(-)	-	-	73..240	H
CrCLO2	-	Crochr51G000034	Chr51:512895..514472(-)	CrCLO1	WGD	63..231	H
CrCLO3	-	Crochr51G000035	Chr51:514925..517566(-)	CrCLO2	Tandem	59..225	H
CrCLO4	-	Crochr11G000516	Chr11:5843509..5845233(-)	CrCLO2	Dispersed	59..226	H
CrCLO5	-	Crochr11G000517	Chr11:5847150..5848578(-)	CrCLO4	Tandem	66..233	H
CrCLO6	-	Crochr6G000092	Chr6:990976..993223(-)	CrCLO4	Dispersed	20..187	L
CrCLO7	-	Crochr6G000093	Chr6:1002800..1005275(-)	CrCLO6	Tandem	39..206	L
CrCLO8	-	Crochr6G000094	Chr6:1009775..1012436(-)	CrCLO7	Tandem	42..210	L
CiCLO1a	-	LOC_Ci18t005770	Chr18:5668729..5670414(+)	-	-	73..240	H
CiCLO1b	-	LOC_Ci63t003670	Chr63:3437254..3439024(-)	CiCLO1a	WGD	73..242	H
CiCLO2a	-	LOC_Ci22t007510	Chr22:7512631..7514072(-)	CiCLO1a	WGD	63..231	H
CiCLO2b	-	LOC_Ci36t003120	Chr36:2972947..2974386(-)	CiCLO2a	WGD	63..231	H
CiCLO3	-	LOC_Ci36t003130	Chr36:2975756..2978060(-)	CiCLO2a	Tandem	59..225	H
CiCLO4a	-	LOC_Ci21t003390	Chr21:3069171..3071320(-)	CiCLO2a	Dispersed	59..226	H
CiCLO4b	-	LOC_Ci38t005650	Chr38:5280912..5282709(+)	CiCLO4a	WGD	59..226	H
CiCLO5a	-	LOC_Ci21t003400	Chr21:3073144..3074889(-)	CiCLO4a	Tandem	68..235	H
CiCLO5b	-	LOC_Ci38t005640	Chr38:5277316..5279017(+)	CiCLO4b	Tandem	67..234	H
CiCLO6a	-	LOC_Ci32t004380	Chr32:4226557..4228799(-)	CiCLO4a	Dispersed	20..187	L
CiCLO6b	-	LOC_Ci26t001760	Chr26:1446526..1448657(-)	CiCLO6a	WGD	20..187	L
CiCLO7a	-	LOC_Ci32t004390	Chr32:4300692..4302408(-)	CiCLO6a	Tandem	39..207	L
CiCLO7b	-	LOC_Ci26t001770	Chr26:1456642..1458367(-)	CiCLO6b	Tandem	38..206	L
CiCLO8	-	LOC_Ci26t001780	Chr26:1462048..1463127(-)	CiCLO7b	Tandem	43..209	L
