# Supplementary material for: Insights into the caleosin family in Cyperus esculentus, an oil-rich tuber plant in Cyperaceae
Source: Research Square preprint supplement (doi:10.21203/rs.3.rs-8567486/v1), 2026-02-16
Supplement: Supplementary file 3 [file Additional file 7.xlsx]

## Sheet: Sheet1
Table S4. Primers used in this study.
Primer name	Primer sequences (5'→3')
CeUCE2Fq	ATCATCAAGGAGACCCAGCG
CeUCE2Rq	CTTAGGGGCAGCCATAGGA
CeTIP41Fq	CGGCGAGCGACCTGAA
CeTIP41Rq	CAGCGGCAGAGTTGAGAATG
CeCLO1Fq	CACAAGCACTACCACCTCT
CeCLO1Rq	GGACATTATCACATTAAACCC
CeCLO2Fq	ACCATCGCCGTTCTTAC
CeCLO2Rq	GCTTGTCTGGATTCGTG
CeCLO3Fq	AAGATGGCGTCATTTACC
CeCLO3Rq	TCGGAAGTGTCGGATAG
CeCLO6Fq	TACCCTTGGGAAACCTT
CeCLO6Rq	TAGATAGGGAGGAGTGGTG
CeCLO7Fq	GAAGATCGCCAATGACT
CeCLO7Rq	AGCGTAACCAAGACCAA
